# Supplementary material for: Effects of haloperidol and clozapine on synapse-related gene expression in specific brain regions of male rats
Source: Springer Nature journal article supplement (doi:10.1007/s00406-018-0872-8), 2018-02-05
Supplement: MOESM1 [file 15441450]

**Supplement**

**Effects of haloperidol and clozapine on synapse-related gene expression in specific brain regions of male rats**

Martina von Wilmsdorff1, Fabian Manthey2, Marie-Luise Bouvier3,a, Oliver Staehlin4, Peter Falkai5, Eva Meisenzahl-Lechner1, Andrea Schmitt5,6*, Peter J Gebicke-Haerter7,8*

1Department of Psychiatry and Psychotherapy, Medical Faculty, Heinrich-Heine-University, Düsseldorf, Germany

2Department of Psychiatry and Psychotherapy, Alexianer Krefeld GmbH, Krefeld, Germany

3Laboratory of Brain Morphology, Department of Psychiatry and Psychotherapy, LVR Klinikum, Heinrich-Heine-University, Duesseldorf, Germany

4Thermo Fisher Sci., Darmstadt, Germany

5Department of Psychiatry and Psychotherapy, Ludwig Maximilians-University (LMU) Munich, Munich, Germany

6Laboratory of Neuroscience (LIM27), Institute of Psychiatry, University of Sao Paulo, São Paulo, Brazil

7Central Institute of Mental Health, Medical Faculty Mannheim / Heidelberg University, Mannheim, Germany

8Facultad de Medicina, Universidad de Chile, Santiago, Chile

*authors contributed equally

**aCorresponding author:**

Marie-Luise Bouvier

Laboratory of Brain Morphology, Department of Psychiatry and Psychotherapy, LVR Klinikum, Heinrich-Heine-University, Duesseldorf, Germany

Bergische Landstr.2

D-40629 Düsseldorf

Tel.: +49-(0)211-922-2751

E-Mail: Marie-Luise.Bouvier@lvr.de

**Figure 1**

**
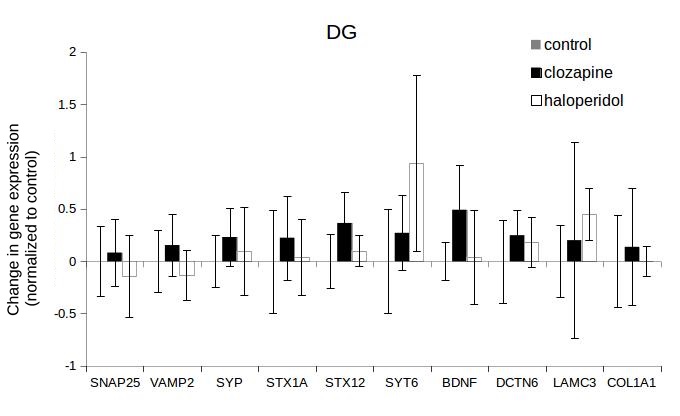
**

Haloperidol- versus clozapine-mediated gene regulation in the dentate gyrus (DG)

**Figure 2**

**
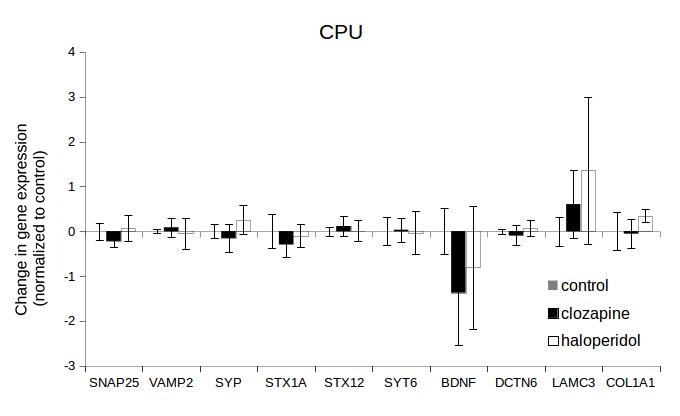
**

Haloperidol- versus clozapine-mediated gene regulation in caudate putamen (CPU)

**Figure 3**

**
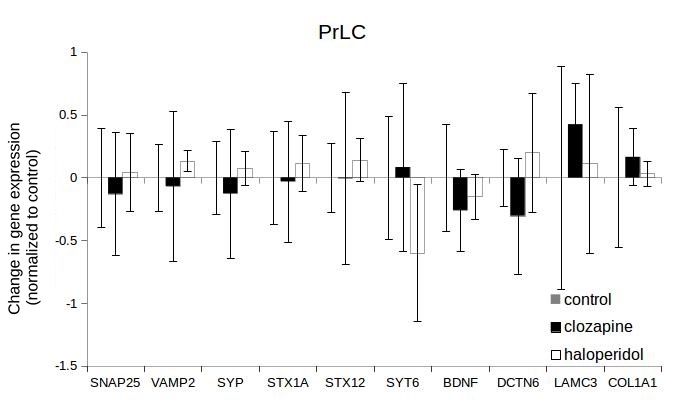
**

Haloperidol- versus clozapine-mediated gene regulation in the prelimbic cortex (PrLC)

**Figure 4**

**
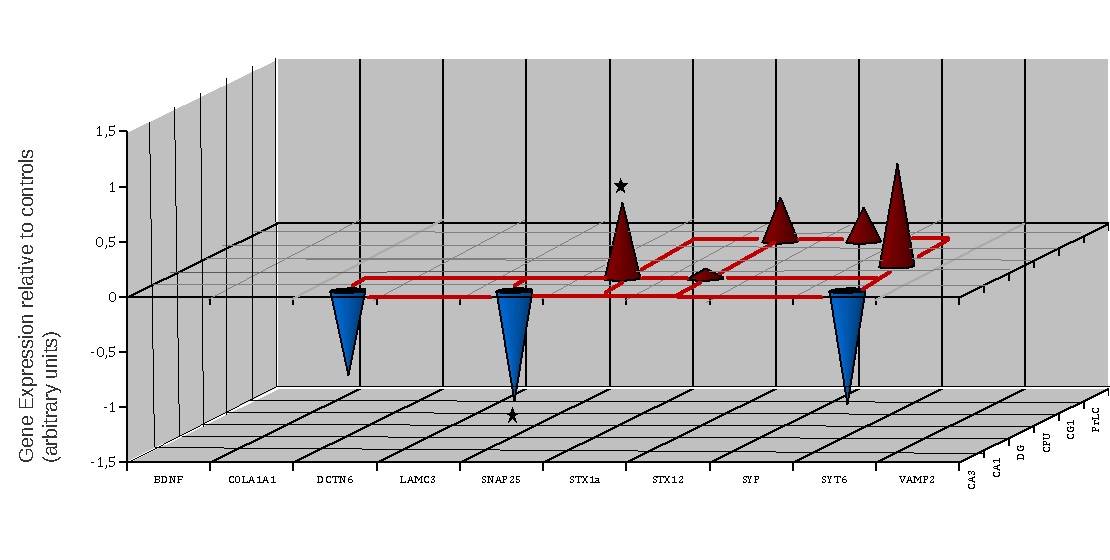
**

Patterns of gene regulation by haloperidol

Genes of interest displayed on the x-axis, expression levels (arbitrary units) on the y-axis and brain regions on the z-axis. Downregulations are in blue, upregulations in red; significant regulations are labelled with asterisks. Some tentative gene (protein) interactions within and across the brain regions are displayed by dotted lines on the zero plane. * = 0.05

Abbreviations of brain regions: CA1 = cornu ammonis 1, CA3 = cornu ammonis 3, CG1 = cingulate gyrus, CPU = caudate putamen, DG = dentate gyrus, PrLC = prelimbic cortex

**Figure 5**

**
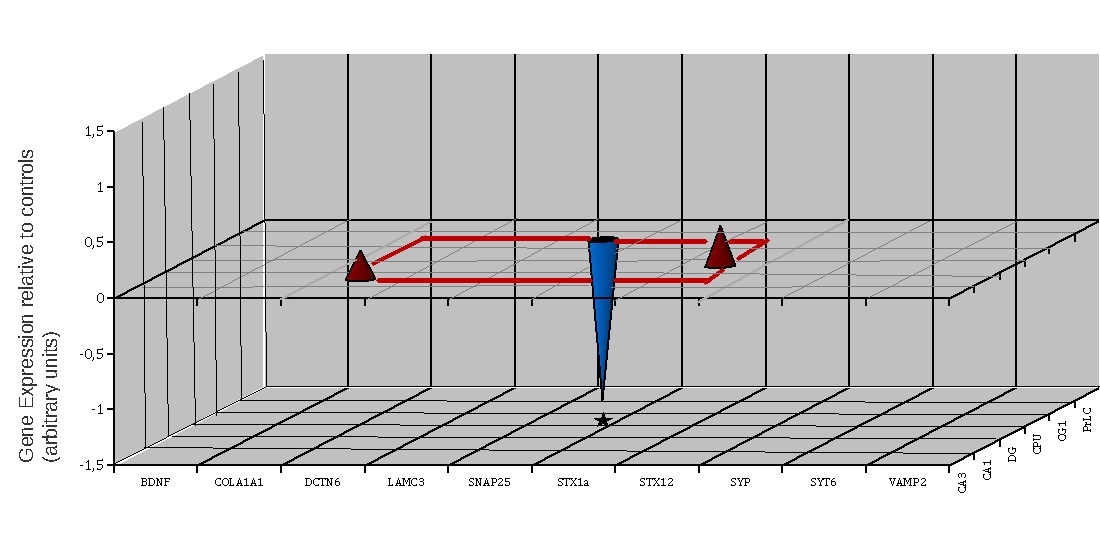
**

Patterns of gene regulation by clozapine

Genes of interest displayed on the x-axis, expression levels (arbitrary units) on the y-axis and brain regions on the z-axis. Downregulations are in blue, upregulations in red; significant regulations are labelled with asterisks. * = 0.05

Abbreviations of brain regions: CA1 = cornu ammonis 1, CA3 = cornu ammonis 3, CG1 = cingulate gyrus, CPU = caudate putamen, DG = dentate gyrus, PrLC = prelimbic cortex
